# Supplementary material for: Impact of Water Related Disasters on Water Related Infectious Disease Risk among Older Adults in India
Source: Research Square preprint supplement (doi:10.21203/rs.3.rs-8263267/v1), 2025-12-16
Supplement: Supplementary file 1 [file 0cd5ac1740e83aa0d8caab83.docx]

**Supplementary file**


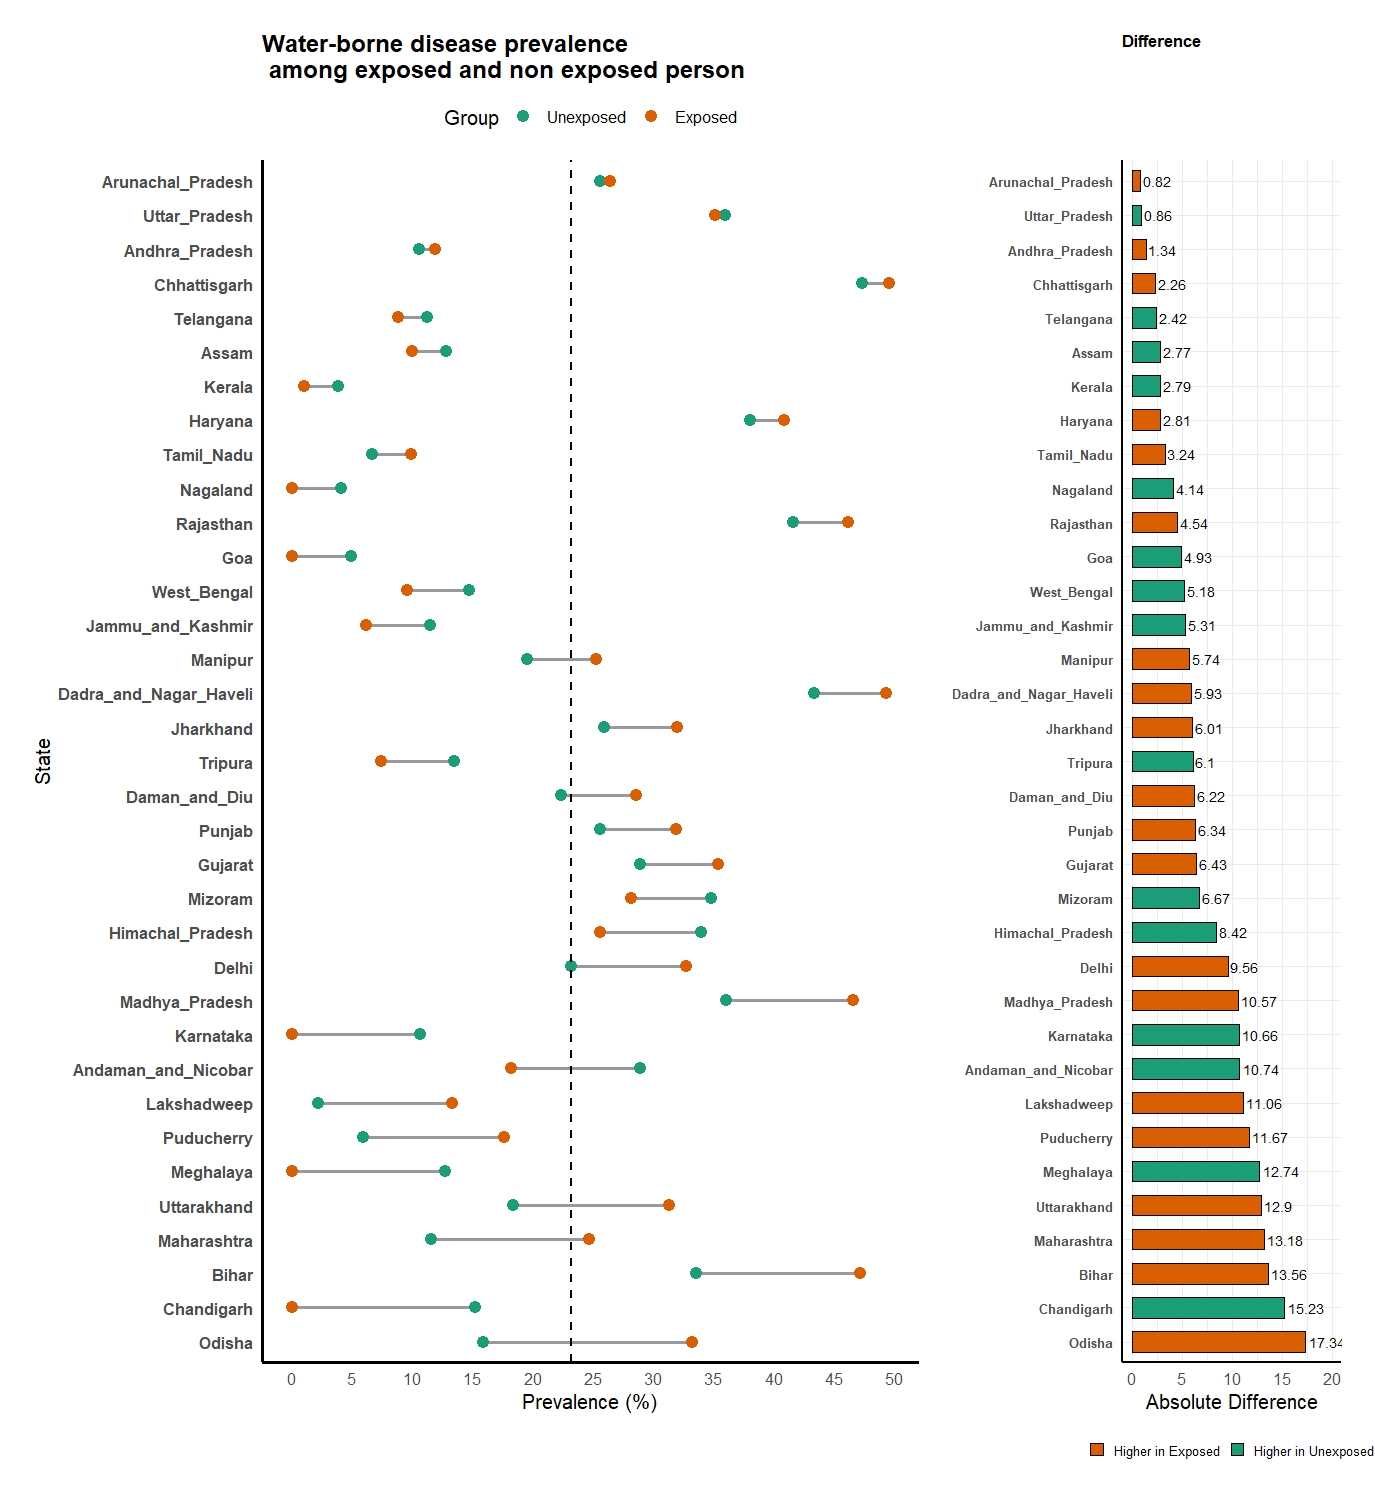


Figure S1: State-wise prevalence of water-related infectious diseases.


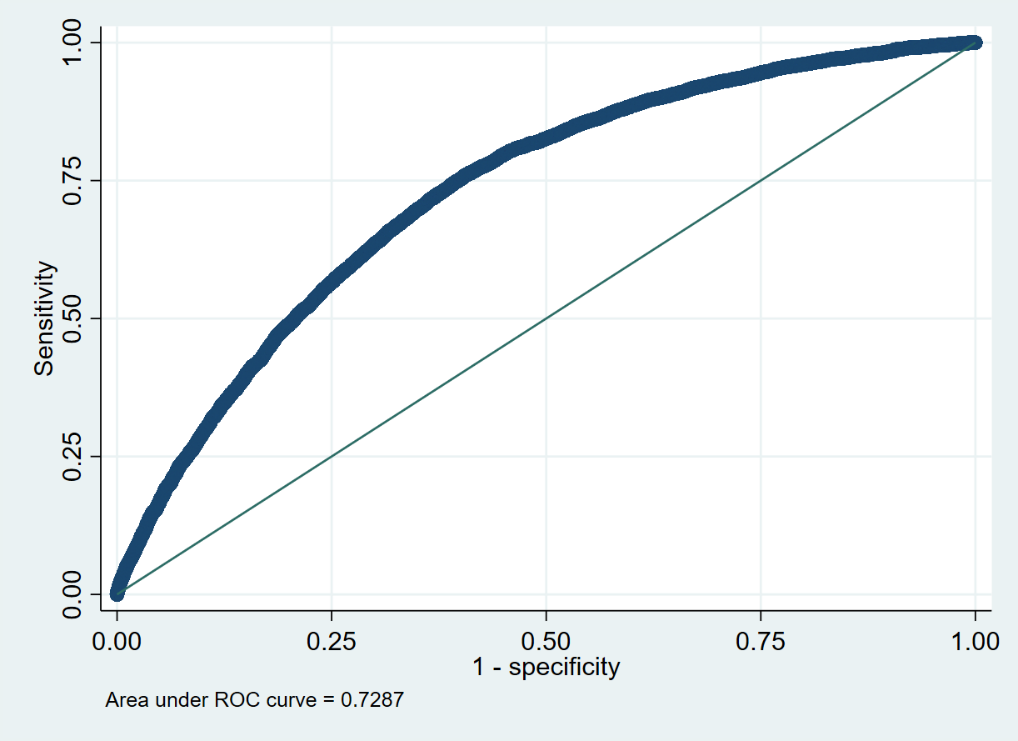


Figure S2: ROC curve of the multivariate logistic regression model.

Table S1: Socio-demographic variation of water-borne diseases amid disaster exposure

| **Variables** | **Unexposed to disaster (%)** | χ² | **Exposed to disaster (%)** | χ² | **Total (%)** | χ² |
| --- | --- | --- | --- | --- | --- | --- |
| **Age (years)** |  |  |  |  |  |  |
| 45–54 | 20.5 | – | 27.4 | – | 21.3 | – |
| 55–64 | 20.9 | 2.7 | 30.6 | 9.3* | 22 | 6.3* |
| 65–74 | 21.3 | – | 30.8 | – | 22.8 | – |
| 75+ | 20.7 | – | 27.3 | – | 21.4 | – |
| **Place of residence** |  |  |  |  |  |  |
| Rural | 24.1 | 669.2*** | 31.7 | 123.7*** | 25.1 | 873.9*** |
| Urban | 15.4 | – | 17.6 | – | 15.6 | – |
| **Year of schooling** |  |  |  |  |  |  |
| No schooling | 24.9 | – | 32.1 | – | 25.9 | – |
| <5 years | 20.6 | – | 28.7 | – | 21.4 | – |
| 5–8 years | 19 | 664.0*** | 27.5 | 73.8*** | 19.9 | 783.2*** |
| 9–12 years | 15.5 | – | 21.7 | – | 16.1 | – |
| >12 years | 12.9 | – | 17.6 | – | 13.2 | – |
| **Social group** |  |  |  |  |  |  |
| Scheduled tribe | 24.1 | – | 30.9 | – | 24.5 | – |
| Scheduled caste | 22.6 | 199.5*** | 29.4 | 17.2** | 23.4 | 204.6*** |
| Other backward class | 20.8 | – | 30.2 | – | 22.1 | – |
| Others | 17.7 | – | 25.3 | – | 18.5 | – |
| **Chronic illness** |  |  |  |  |  |  |
| None | 20.6 | – | 27.8 | – | 21.5 | – |
| One | 21.8 | 15.6** | 29.5 | 8.6* | 22.7 | 14.3** |
| Two | 20.3 | – | 32 | – | 21.6 | – |
| 2+ | 19.6 | – | 31.7 | – | 20.8 | – |
| **Wealth quantile** |  |  |  |  |  |  |
| Poorest | 22.1 | – | 30.7 | – | 23.1 | – |
| Poorer | 23.1 | – | 31.7 | – | 24 | – |
| Middle | 20.5 | 93.9*** | 29.6 | 19.2** | 21.5 | 110.9*** |
| Richer | 19.9 | – | 26.7 | – | 20.6 | – |
| Richest | 18.7 | – | 26.1 | – | 19.5 | – |
| **Drinking water treatment** | |  |  |  |  |  |
| Yes | 17.3 | 360.0*** | 24.2 | 42.0*** | 17.9 | 443.0*** |
| No | 23.5 | – | 31.2 | – | 24.5 | – |
| **Open defecation** |  |  |  |  |  |  |
| Yes | 29.1 | 577.8*** | 40.3 | 227.5*** | 31.1 | 892.1*** |
| No | 19 | – | 23.7 | – | 19.5 | – |
| **ADL** |  |  |  |  |  |  |
| None | 20.3 | – | 27.4 | – | 21.1 | – |
| One | 23.9 | 74.6*** | 36.5 | 47.7*** | 25.5 | 122*** |
| Two | 25 | – | 34.3 | – | 26 | – |
| 2+ | 24.6 | – | 38.4 | – | 26.7 | – |
| **Housing dampness** |  |  |  |  |  |  |
| Yes | 24.2 | – | 29.3 | – | 24.9 | – |
| No | 20 | 107.4*** | 28.8 | 2.2 | 20.9 | 106.0*** |
| **Geographical Region** |  |  |  |  |  |  |
| Arid region | 4.19 | – | 0 | – | 4.1 | – |
| Plains | 18.4 | – | 36.3 | – | 20.8 | – |
| Plateau | 19.8 | 698.0*** | 22.7 | 130.3*** | 20 | 674.1*** |
| Hills/Mountains | 24.8 | – | 29.5 | – | 25.4 | – |
| Island/coastal | 22.8 | – | 23.7 | – | 22.9 | – |
| **Total** | 20.8 | – | 28.9 | – | 21.7 | – |

Table S2: Description of the variables used in the present study.

| **Variable Category** | **Variable Name** | **Description / Coding** |
| --- | --- | --- |
| **Outcome Variable** | **Any Water-Related Infectious Disease (WRID)** | Respondent was asked whether, in the past two years, they had any of the following conditions: *malaria, diarrhea, typhoid, chikungunya, or dengue*. Each item was coded as 1 = Yes, 0 = No. A composite WRID variable was created: **1 = reported at least one of the five diseases**, **0 = reported none** |
| **Key Explanatory Variable** | **Water-Related Disaster (WRD) Exposure** | Disaster exposure was assessed by asking: *“In the last five years, has your health been severely affected by disasters such as floods, landslides, extreme temperatures, cyclones/typhoons, droughts, earthquakes, tsunamis, or any other natural calamities?”* (1 = Yes, 0 = No). For this study, exposure to **floods, cyclones/typhoons, or tsunamis** was categorized as **water-related disaster exposure**. Composite variable: **1 = WRD exposed**, **0 = not exposed** |
| **Socio-Demographic Variables** | **Age Group** | Categories: 45–54 years (ref), 55–64 years, 65–74 years, ≥75 years. |
|  | **Education Level** | No schooling, <5 years, 5–8 years, 9–12 years, >12 years of schooling. |
|  | **Social Group (Caste)** | Scheduled Tribe (ST), Scheduled Caste (SC), Other Backward Class (OBC), Others (ref). |
|  | **Household Wealth Quintile** | Poorest, Poorer, Middle, Richer, Richest. |
|  | **Place of Residence** | Rural (ref), Urban. |
|  | **Geographical Region (geo_region)** | Derived from state-level classification:  **1. Plains** → Bihar, Haryana, Punjab, Uttar Pradesh, West Bengal, Delhi.  **2. Plateau** → Andhra Pradesh, Chhattisgarh, Jharkhand, Karnataka, Madhya Pradesh, Maharashtra, Telangana.  **3. Hills/Mountains** → Arunachal Pradesh, Assam, Himachal Pradesh, Jammu & Kashmir, Manipur, Meghalaya, Mizoram, Nagaland, Tripura, Uttarakhand. **4. Dry/Desert** → Gujarat, Rajasthan.  **5. Island/Coastal** → Andaman & Nicobar, Dadra & Nagar Haveli, Daman & Diu, Goa, Kerala, Lakshadweep, Puducherry, Tamil Nadu, Odisha. |
| **Daily Life Conditions** | **Drinking Water Treatment** | Household treats drinking water: Yes / No. |
|  | **Open Defecation** | Household practices open defecation: Yes / No. |
|  | **Housing Dampness** | Presence of damp/wet walls or floors: Yes / No. |
|  | **Chronic Illness Count** | Number of chronic diseases reported: None (ref), One, Two, more than two. |
|  | **ADL Limitations** | Difficulties in Activities of Daily Living: None (ref), One, Two, more than two. |
